# Supplementary material
Source: ML conference proceedings conference paper supplement (https://proceedings.neurips.cc/paper_files/paper/2023/hash/a86b7a9bf7647d6f9f9168d8167d9283-Abstract.html)
Supplement: Supplementary file 1 [file a86b7a9bf7647d6f9f9168d8167d9283-Supplemental-Conference.pdf]

346 **A The proof of Proposition 1**

347 *Proof.* Because  $\mathcal{K}$  is a Hilbert-Schmidt kernel, we have  $\iint_{X \times X} |\mathcal{K}(\mathbf{x}, \mathbf{y})|^2 d\mu(\mathbf{x})d\mu(\mathbf{y}) < \infty$ . Then,

$$\begin{aligned} \iint_{X \times X} |\mathcal{H}^{(q)}(\mathbf{x}, \mathbf{y})|^2 d\mu(\mathbf{x})d\mu(\mathbf{y}) &= \int_X \int_X \left| \frac{\mathcal{K}(\mathbf{x}, \mathbf{y}) + \mathcal{K}(\mathbf{y}, \mathbf{x})}{2} \right|^2 d\mu(\mathbf{x})d\mu(\mathbf{y}) \\ &\leq \int_X \int_X \frac{1}{2} (|\mathcal{K}(\mathbf{x}, \mathbf{y})|^2 + |\mathcal{K}(\mathbf{y}, \mathbf{x})|^2) d\mu(\mathbf{x})d\mu(\mathbf{y}) \\ &= \int_X \int_X |\mathcal{K}(\mathbf{x}, \mathbf{y})|^2 d\mu(\mathbf{x})d\mu(\mathbf{y}) < \infty. \end{aligned}$$

348 It holds that the symbol “ $\leq$ ” in the third row of the above equation because of the Cauchy-Schwarz in-  
 349 equality. The Cauchy-Schwarz inequality states that  $\forall a_i, b_i \in \mathbb{R}, i = 1, \dots, k$ , then  $(\sum_{i=1}^k a_i b_i)^2 \leq$   
 350  $(\sum_{i=1}^k a_i^2)(\sum_{i=1}^k b_i^2)$ . Then, we have  $|\frac{\mathcal{K}(\mathbf{x}, \mathbf{y})}{2} + \frac{\mathcal{K}(\mathbf{y}, \mathbf{x})}{2}|^2 \leq (\frac{1}{4} + \frac{1}{4}) \cdot (|\mathcal{K}(\mathbf{x}, \mathbf{y})|^2 + |\mathcal{K}(\mathbf{y}, \mathbf{x})|^2)$ ,  
 351 and measure  $\mu$  is non-negative. Thus, symbol “ $\leq$ ” in the third row holds. We finish the proof.  $\square$

352 **B The proof of Proposition 2**

353 *Proof.* The associated kernel  $\mu(\mathbf{x}, \mathbf{y}, q)$  of the operator (5) is a Hermitian kernel, i.e.,  $\mu(\mathbf{x}, \mathbf{y}, q) =$   
 354  $\overline{\mu(\mathbf{y}, \mathbf{x}, q)}$ , then the eigenvalues of (5) are real and the spectral radius is equal to the operator norm  
 355  $R(\rho) = \|T^{(q)}\|$  [36]. Let  $f \in L^2(X, \mu)$ , we have

$$\begin{aligned} \langle T^{(q)} f, f \rangle &= \int_X \int_X \rho(\mathbf{x}, \mathbf{y}, q) f(\mathbf{y}) \overline{f(\mathbf{x})} d\mu(\mathbf{x})d\mu(\mathbf{y}) \\ &= \int_X \int_X \mathcal{H}^{(q)}(\mathbf{x}, \mathbf{y}) \frac{f(\mathbf{y})}{\sqrt{m(\mathbf{y})}} \frac{\overline{f(\mathbf{x})}}{\sqrt{m(\mathbf{x})}} d\mu(\mathbf{x})d\mu(\mathbf{y}). \end{aligned}$$

356 If we apply the Cauchy-Schwarz inequality as follows,

$$\begin{aligned} \left| \int_X \mathcal{H}^{(q)}(\mathbf{x}, \mathbf{y}) \frac{f(\mathbf{y})}{\sqrt{m(\mathbf{y})}} d\mu(\mathbf{y}) \right| &\leq \left( \int_X |\mathcal{H}^{(q)}(\mathbf{x}, \mathbf{y})| d\mu(\mathbf{y}) \right)^{\frac{1}{2}} \left( \int_X |\mathcal{H}^{(q)}(\mathbf{x}, \mathbf{y})|^{\frac{1}{2}} \frac{|f(\mathbf{y})|^2}{m(\mathbf{y})} d\mu(\mathbf{y}) \right)^{\frac{1}{2}} \\ &\leq \left( \int_X |\mathcal{H}^{(q)}(\mathbf{x}, \mathbf{y})| d\mu(\mathbf{y}) \right)^{\frac{1}{2}} \left( \int_X |\mathcal{H}^{(q)}(\mathbf{x}, \mathbf{y})| \frac{|f(\mathbf{y})|^2}{m(\mathbf{y})} d\mu(\mathbf{y}) \right)^{\frac{1}{2}} \\ &= \left( \int_X S(\mathbf{x}, \mathbf{y}) d\mu(\mathbf{y}) \right)^{\frac{1}{2}} \left( \int_X S(\mathbf{x}, \mathbf{y}) \frac{|f(\mathbf{y})|^2}{m(\mathbf{y})} d\mu(\mathbf{y}) \right)^{\frac{1}{2}}, \end{aligned}$$

357 where  $S(\mathbf{x}, \mathbf{y}) = |\mathcal{H}^{(q)}(\mathbf{x}, \mathbf{y})| = \frac{1}{2} |\mathcal{K}(\mathbf{x}, \mathbf{y}) + \mathcal{K}(\mathbf{y}, \mathbf{x})|$ . The asymmetric kernel  $\mathcal{K}$  is non-negative,  
 358 thus  $S(\mathbf{x}, \mathbf{y}) = \frac{1}{2} (\mathcal{K}(\mathbf{x}, \mathbf{y}) + \mathcal{K}(\mathbf{y}, \mathbf{x}))$ . Then we have

$$\begin{aligned} \left| \int_X \mathcal{H}^{(q)}(\mathbf{x}, \mathbf{y}) \frac{f(\mathbf{y})}{\sqrt{m(\mathbf{y})}} d\mu(\mathbf{y}) \right| &\leq \left( \int_X S(\mathbf{x}, \mathbf{y}) d\mu(\mathbf{y}) \right)^{\frac{1}{2}} \left( \int_X S(\mathbf{x}, \mathbf{y}) \frac{|f(\mathbf{y})|^2}{m(\mathbf{y})} d\mu(\mathbf{y}) \right)^{\frac{1}{2}} \\ &= \sqrt{m(\mathbf{x})} \left( \int_X S(\mathbf{x}, \mathbf{y}) \frac{|f(\mathbf{y})|^2}{m(\mathbf{y})} d\mu(\mathbf{y}) \right)^{\frac{1}{2}}. \end{aligned}$$

359 Consequently,

$$\langle T^{(q)} f, f \rangle \leq \int_X |f(\mathbf{x})| \left( \int_X S(\mathbf{x}, \mathbf{y}) \frac{|f(\mathbf{y})|^2}{m(\mathbf{y})} d\mu(\mathbf{y}) \right)^{\frac{1}{2}} d\mu(\mathbf{x}).$$

360 We can apply the Cauchy-Schwarz inequality again,

$$\begin{aligned}
\langle T^{(q)} f, f \rangle &\leq \|f\| \left( \int_X \int_X S(\mathbf{x}, \mathbf{y}) \frac{|f(\mathbf{y})|^2}{m(\mathbf{y})} d\mu(\mathbf{y}) d\mu(\mathbf{x}) \right)^{\frac{1}{2}} \\
&= \|f\| \left( \int_X \frac{|f(\mathbf{y})|^2}{m(\mathbf{y})} \left( \int_X S(\mathbf{x}, \mathbf{y}) d\mu(\mathbf{x}) \right) d\mu(\mathbf{y}) \right)^{\frac{1}{2}} \\
&= \|f\| \left( \int_X \frac{|f(\mathbf{y})|^2}{m(\mathbf{y})} m(\mathbf{y}) d\mu(\mathbf{y}) \right)^{\frac{1}{2}} = \|f\|^2.
\end{aligned}$$

361 It can be noticed that the operator norm  $\|T^{(q)}\| = 1$ . Therefore, the spectral radius  $R(\rho) = 1$ . We  
362 finish the proof.

363

□

### 364 C Selection of the scaling parameter $q$ .

365 As illustrated in Fig. F1, we suggest choosing a period that encompasses the range of the skew-  
366 symmetric component, i.e.,  $\bar{a}$  should be less than  $\pi$ , where  $\bar{a}$  is defined as follows,

$$\bar{a} := \sup_{\mathbf{x}, \mathbf{y} \in X} |\mathcal{K}(\mathbf{x}, \mathbf{y}) - \mathcal{K}(\mathbf{y}, \mathbf{x})|,$$

367 and the period of the phase function is  $T = \frac{2\pi}{2\pi q} = 1/q$ . Thus, we have

$$T = \frac{1}{q} > 2\bar{a} \quad \Rightarrow \quad q < \frac{1}{2\bar{a}}.$$

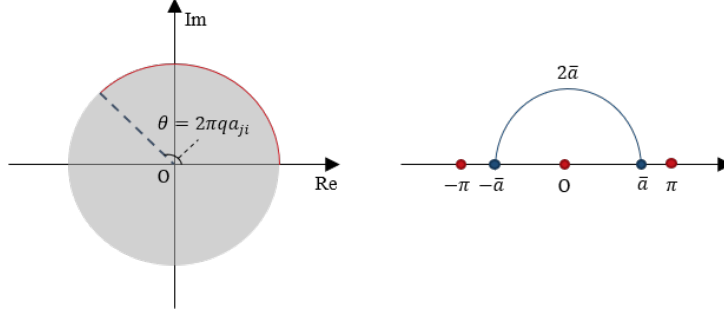

Figure F1: A simple illustration for selecting  $q$ .

368

## 369 D Algorithm

370 To apply MagDM, we require a dataset and an asymmetric kernel or an asymmetric Gram matrix, as  
 371 well as the scaling parameter  $q$  and the desired accuracy. Algorithm 1 outlines the MagDM procedure.

---

### Algorithm 1 MagDM for asymmetric kernels

---

**Input:** The Gram matrix  $\mathbf{K}$  of dataset  $X$  endowed with an asymmetric kernel  $\mathcal{K}$ , the scaling parameter  $q$  and a preset accuracy  $\delta$ .

**Output:** The diffusion map  $\psi^{t,(q)}$  of  $X$ .

1: Calculate the Hermitian Gram matrix  $\mathbf{H}$  of the asymmetric Gram matrix  $\mathbf{K}$  by (3) and (4).

2: Calculate the  $t$ -powers kernel matrix  $\mathbf{H}^t$ .

3: Run eigen-decomposition of  $\mathbf{H}^t$  and denote its eigen-system as  $\{\lambda_n^{(q)}, \phi_n^{(q)}\}$ .

4:  $s(\delta, t) \leftarrow \max\{n \in \mathbb{N} : |\lambda_n^{(q)}| > \delta |\lambda_1^{(q)}|\}$ .

5: Return the diffusion map  $\psi^{t,(q)}$  by (8).

---

372 **Limitations.** Researchers should note that the MagDM method proposed in this paper has some  
 373 limitations. One such limitation is its dependence on the choice of asymmetric kernel functions,  
 374 which can impact its performance. Additionally, MagDM may be computationally expensive for  
 375 large datasets, as it requires  $\mathcal{O}(N^2)$  memory and  $\mathcal{O}(N^3)$  computational complexity to derive the  
 376 spectral decomposition. However, this limitation can be addressed through the use of out-of-sample  
 377 extensions, which are discussed in Appendix E.

## 378 E Out-of-sample extensions.

379 Out-of-sample extensions are useful in many applications where low-dimensional embeddings  
 380 computed on the original dataset are extended to new data. The Nyström extension is a well-known  
 381 technique used in the machine learning community to approximate the Gram matrix by a low-rank  
 382 embedding. However, the out-of-sample extension of diffusion maps for asymmetric kernels has not  
 383 been studied before. Here, we present the corresponding Nyström-based extension for out-of-sample  
 384 cases. As discussed earlier, the integral operator (5) is compact and self-adjoint, whose spectral  
 385 decomposition is  $\{\lambda_n^{(q)}, \phi_n^{(q)}\}$ . If  $\lambda_n^{(q)} \neq 0$ , the following identity holds for  $\mathbf{x} \in X$ :

$$\phi_n^{(q)}(\mathbf{x}) = \frac{T^{(q)}}{\lambda_n^{(q)}} \phi_n^{(q)}(\mathbf{x}) = \int_X \frac{\rho(\mathbf{x}, \mathbf{y}, q)}{\lambda_n^{(q)}} \phi_n^{(q)}(\mathbf{y}) d\mu(\mathbf{y}).$$

386 The Nyström extension extends the equation above to new data  $Z$  such that  $X \subseteq Z$  as follows,

$$\phi_n^{(q)}(\mathbf{z}) = \int_X \frac{\rho(\mathbf{z}, \mathbf{y}, q)}{\lambda_n^{(q)}} \phi_n^{(q)}(\mathbf{y}) d\mu(\mathbf{y}), \quad (\text{a1})$$

387 where  $\mathbf{z} \in Z$  and  $\phi_n^{(q)}(\mathbf{z}) = \sum_{\mathbf{y} \in X} \frac{\rho(\mathbf{z}, \mathbf{y}, q)}{N \lambda_n^{(q)}} \phi_n^{(q)}(\mathbf{y})$  is the empirical form of (a1) for  $X$ . This allows

388 the eigenfunctions to be extended for new data, enabling the extension of MagDM (8) as follows,

$$\psi^{t,(q)}(\mathbf{z}) = \sum_{\mathbf{y} \in X} \left[ \frac{\rho(\mathbf{z}, \mathbf{y}, q)}{N} \phi_1^{(q)}(\mathbf{y}), \quad \frac{\rho(\mathbf{z}, \mathbf{y}, q)}{N} \phi_2^{(q)}(\mathbf{y}), \quad \dots, \quad \frac{\rho(\mathbf{z}, \mathbf{y}, q)}{N} \phi_{s(\delta,t)}^{(q)}(\mathbf{y}) \right]^\top.$$

## 389 F Descriptions and figures of datasets

390 In this section, we visualize the datasets using either expert knowledge or a force-directed layout. We  
 391 hope that these visualizations will help readers gain a better understanding of the data.

### 392 F.1 The first artificial network

393 Fig. F2(a) provides the running flow of the first artificial network and Fig. F2(b) shows an example  
 394 of the directed graphs generated with  $P = 0$ , where the asymmetric adjacency connection can be  
 395 considered as an asymmetric kernel.

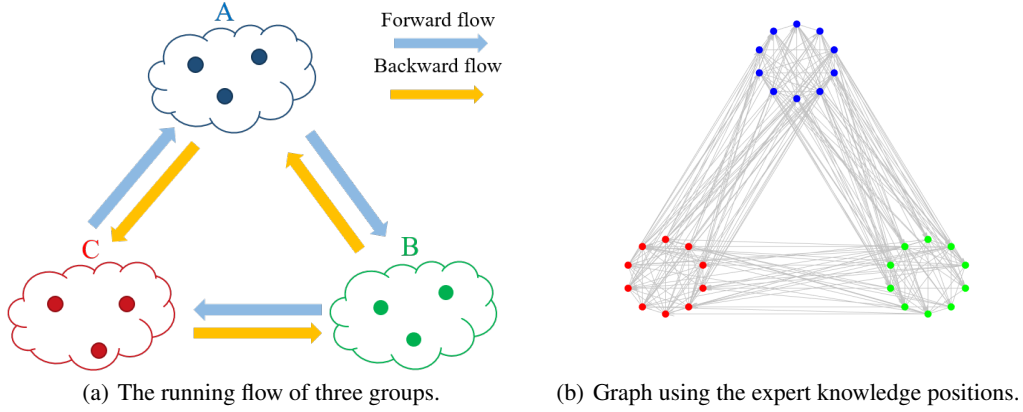

Figure F2: An illustration of the first artificial network. (a) The running flow of three groups A, B and C. The directed/asymmetric information is nested in the running flow. (b) An instance of a directed graph generated by the running flow with backward flow probability  $P = 0$ .

396 **F.2 The second artificial network**

397 The running flow of the second artificial network comprises four groups (A, B, C, and D). The  
 398 structure of the flow is apparent, with groups A and D serving as out-come and in-come nodes,  
 399 respectively, while groups B and C function as communicators. Groups B and C are two dense sets  
 400 containing 20 nodes and Group A and D are a pair of datasets whose interconnections are much more  
 401 than Group B and C.

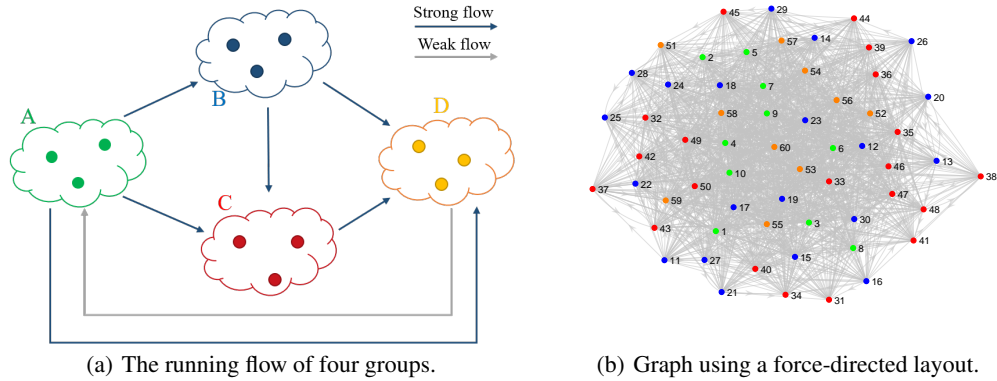

Figure F3: An illustration of the second artificial network. (a) The running flow of three groups A, B, C and D. The directed/asymmetric information is nested in the running flow. (b) An instance of a directed graph generated by the running flow with Groups A and D playing a particular role (green and orange nodes) and Groups B and C playing a role of a communicator (red and blue nodes).

402 **F.3 The Möbius strip**

403 The Möbius strip dataset is a set of 300 points randomly distributed along the Möbius strip. The  
 404 parametric form of the Möbius strip is defined by,

$$x(u, v) = \left(1 + \frac{v}{2} \cos \frac{u}{2}\right) \cos u, \quad y(u, v) = \left(1 + \frac{v}{2} \cos \frac{u}{2}\right) \sin u, \quad z(u, v) = \frac{v}{2} \sin \frac{u}{2},$$

405 where  $0 \leq u \leq 2\pi$  and  $-0.5 \leq v \leq 0.5$ . The dataset is with a color drift in the counterclockwise  
 406 direction on the x-y plane in Fig. F4.

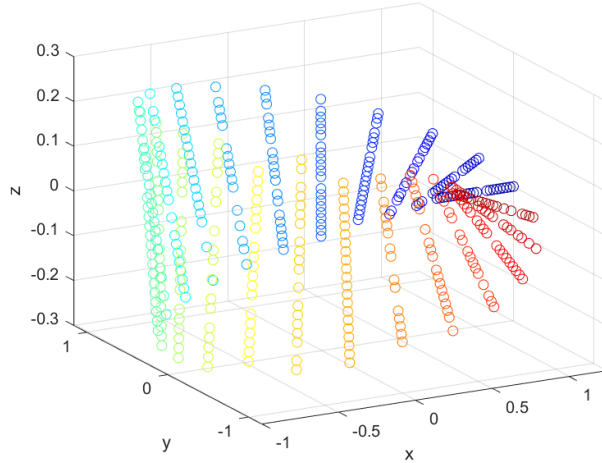

Figure F4: Dataset with 300 random points in the Möbius strip.

#### 407 F.4 Two trophic networks

408 We have chosen two specific trophic networks: the Mondego [32] and Florida [33] networks, which  
 409 are part of the Pajek datasets. These networks have recorded the trophic exchanges at Mondego  
 410 estuary and Florida bay during the wet season, respectively. Based on the roles of the nodes in these  
 411 ecosystems, we have classified them into different categories, as shown in Appendix F5. The green  
 412 nodes, such as 2um Spherical Phytoplankt and Phytoplankton, are producers that generate their own  
 413 food through photosynthesis or chemosynthesis. The brown and red nodes are low-level consumers  
 414 like littorina and high-level consumers like bonefish and crocodiles that feed on other organisms for  
 415 energy. Additionally, the purple node in the Florida network represents decomposers that break down  
 416 dead or decaying organic matter. Finally, the blue and turquoise blue nodes correspond to the input,  
 417 output, and organic matter of the ecosystem, respectively.

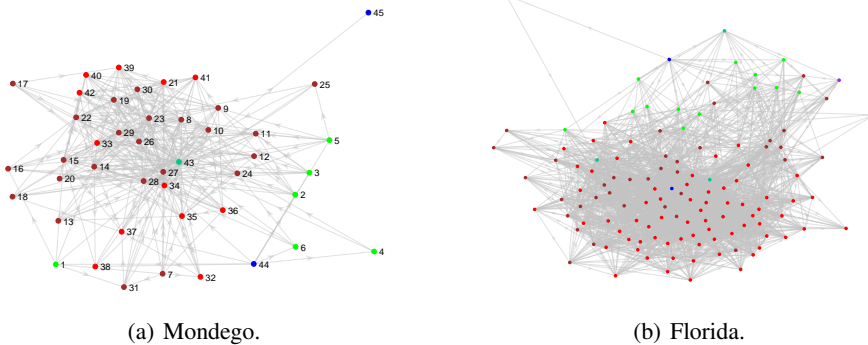

Figure F5: The trophic networks using force-direct layout. Nodes among this network are classified into several categories, The green nodes are producers that generate their own food through photosynthesis or chemosynthesis. The brown and red nodes are low-level consumers and high-level consumers that feed on other organisms for energy. Additionally, the purple node in the Florida network represents decomposers that break down dead or decaying organic matter. The blue and turquoise blue nodes correspond to the input, output, and organic matter of the ecosystem.
